# Supplementary material for: Patient-derived glioblastoma cultures as a tool for small-molecule drug discovery
Source: PubMed Central journal article supplement (PMC6996910; doi:10.18632/oncotarget.27457), 2020-01-28
Supplement: oncotarget-11-443-s001.pdf [file oncotarget-11-443-s001.pdf]

## Patient-derived glioblastoma cultures as a tool for small-molecule drug discovery

### SUPPLEMENTARY MATERIALS

Supplementary Table 1: De-identified disease and treatment information of GBM cell lines

| De-identifier | Diagnosis        | Location               | Treatment status @ surgery                         | Treatment after surgery            | Additional information               |
|---------------|------------------|------------------------|----------------------------------------------------|------------------------------------|--------------------------------------|
| HF2303        | GBM              | L parietal             | untreated                                          | TMZ/RT                             | gliosarcoma                          |
| HF2381        | GBM              | R temporal             | untreated                                          | TMZ/RT<br>Novacea A4QN             |                                      |
| HF2414        | GBM              | L temporal             | untreated                                          | TMZ/RT/<br>bevacizumab CPT-11      |                                      |
| HF2476        | GBM              | R frontal              | untreated                                          | TMZ/RT/ erlotinib /<br>bevacizumab |                                      |
| HF2485        | GBM              | R temporal             | untreated                                          | TMZ/RT/<br>bevacizumab/<br>CPT-11  |                                      |
| HF2561        | GBM              | R parietal             | RT/TMZ                                             | Adnexus CT-322                     |                                      |
| HF2562        | GBM              | L frontal              | untreated                                          | RT/TMZ -><br>bevacizumab           | gliosarcoma                          |
| HF2575        | GBM              | R temporal             | RT/TMZ                                             | bevacizumab/<br>CPT-11             | gliosarcoma                          |
| HF2609        | GBM              | L temporal<br>parietal | RT/TMZ/<br>cilengitide<br>->bevacizumab/irinotecan | null                               |                                      |
| HF2790        | GBM              | R temporal             | untreated                                          | RT                                 |                                      |
| HF2876        | GBM<br>recurrent | R occipital            | RT/TMZ/ hydroxy-<br>chloroquine                    | irinotecan,<br>bevacizumab         |                                      |
| HF2885        | GBM              | Cerebellum             | untreated                                          | null                               |                                      |
| HF2906        | GBM              | L frontal              | untreated                                          | RT/TMZ                             |                                      |
| HF2941        | GBM<br>recurrent | L temporal             | TMZ/RT                                             | bevacizumab                        |                                      |
| HF2998        | GBM              | R temporal             | untreated                                          | RT/TMZ                             |                                      |
| HF3013        | GBM              | R temporal             | untreated                                          | TMZ/RT/<br>DCVax<br>->MetMab       |                                      |
| HF3019        | GBM              | L frontal              | untreated                                          | RT/TMZ                             | *variable cell<br>culture conditions |
| HF3026        | GBM              | R temporal             | untreated                                          | RT/TMZ                             |                                      |
| HF3037        | GBM<br>recurrent | R parietal             | RT/TMZ/ bevacizumab                                | TMZ/CCNU                           |                                      |

|        |                   |            |                          |                     |                                                                                                      |
|--------|-------------------|------------|--------------------------|---------------------|------------------------------------------------------------------------------------------------------|
| HF3177 | GBM recurrent     | R temporal | TMZ/RT followed by DCvax | RT/ CCNU            | gliosarcoma                                                                                          |
| HF3216 | GBM               | R temporal | untreated                | RT/TMZ              |                                                                                                      |
| HF3309 | Oligodendroglioma | R frontal  | untreated                | TMZ                 | progressed to GBM, tumor positive for IDH1 R132H, 1p/19q mutation; *variable cell culture conditions |
| HF3373 | GBM               | R frontal  | untreated                | RT/TMZ, -> Novo TTF | gliosarcoma                                                                                          |

For each GBM ( $n = 23$ ), the diagnosis, tumor location, treatment plan and additional information were recorded.

\*HF3019 and HF3309 were grown as 3D neurospheres for high-throughput screening, but grown as a monolayer with laminin and serum for RNA sequencing.

**Supplementary Table 2: De-identified patient information of GBM cell lines**

| De-identifier | Age @ diagnosis (years) | Gender | OS (days) | TTP1 (days) | MGMT |
|---------------|-------------------------|--------|-----------|-------------|------|
| HF2303        | 62                      | M      | 317       | 88          | U    |
| HF2381        | 66                      | M      | 180       | 85          | M    |
| HF2414        | 66                      | F      | 1481      | 196         | U    |
| HF2476        | 39                      | F      | 717       | 351         | M    |
| HF2485        | 54                      | M      | 432       | 150         | M    |
| HF2561        | 43                      | M      | 659       | 261         | U    |
| HF2562        | 30                      | M      | 632       | 213         | U    |
| HF2575        | 32                      | M      | 188       | 588         | n/a  |
| HF2609        | 46                      | M      | 655       | 291         | U    |
| HF2790        | 79                      | F      | 138       | 88          | M    |
| HF2876        | 62                      | M      | 558       | 167         | U    |
| HF2885        | 45                      | F      | 45        | 30          | U    |
| HF2906        | 54                      | F      | 339       | null        | U    |
| HF2941        | 56                      | M      | 1255      | 249         | n/a  |
| HF2998        | 67                      | F      | 131       | 39          | U    |
| HF3013        | 59                      | M      | 270       | 192         | M    |
| HF3019        | 70                      | M      | 203       | null        | M    |
| HF3026        | 64                      | F      | 169       | 98          | U    |
| HF3037        | 51                      | F      | 557       | 171         | U    |
| HF3177        | 45                      | M      | 646       | 88          | U    |
| HF3216        | 76                      | M      | 94        | null        | U    |
| HF3309        | 45                      | M      | 1143      | 434         | M    |
| HF3373        | 71                      | M      | 318       | null        | M    |

For each GBM ( $n = 23$ ), the age, gender, survival data, and MGMT methylation status (U for unmethylated, M for methylated) were recorded.
